# Supplementary material for: Effect of chelate ring and rigidity on Se⋯N interactions: a computational study
Source: Royal Society of Chemistry journal article supplement (doi:10.1039/c2ra20591b), 2012-01-01

## Appendix A

Supporting Information for

### Effect of chelate ring and rigidity on Se...N interactions: A Computational Study

Raghu Nath Behera\*<sup>1</sup> and Arunashree Panda\*<sup>2</sup>

Department of Chemistry, Birla Institute of Technology & Science, Pilani – K. K. Birla Goa  
Campus, Zuarinagar - 403726, Goa, India

---

Contents:

Table S1: Optimized geometries of compounds **1a-e**, **2a-e** and **3a-e**      page 2 - 14

Figure S1: Molecular plots of compounds **1a-e**, **2a-e** and **3a-e**      page 15 - 22

---

Table S1. Cartesian coordinates of the optimized geometries of **1a-e**, **2a-e** and **3a-e** (**a** = Cl, **b** = Br, **c** = I, **d** = SPh, **e** = CH<sub>2</sub>Ph, Ph: Phenyl) computed at B3LYP/6-31G(d)/LanL2DZ level of theory. The LanL2DZ basis function is used for **c** = I compounds only.

### Optimized geometry of Se complex **1a**

|    |              |              |              |
|----|--------------|--------------|--------------|
| 7  | 1.259115000  | -0.828745000 | -0.097573000 |
| 6  | 1.510637000  | 0.438602000  | -0.055779000 |
| 8  | 2.735095000  | 0.998885000  | -0.033996000 |
| 6  | 3.854235000  | 0.103639000  | -0.227478000 |
| 6  | 3.614714000  | -1.233974000 | 0.461706000  |
| 6  | 2.308758000  | -1.837315000 | -0.065691000 |
| 1  | 4.715566000  | 0.636592000  | 0.179291000  |
| 1  | 3.997993000  | -0.026900000 | -1.307402000 |
| 1  | 3.546593000  | -1.078042000 | 1.544533000  |
| 1  | 4.459212000  | -1.905676000 | 0.273287000  |
| 1  | 1.967458000  | -2.664153000 | 0.566263000  |
| 1  | 2.445776000  | -2.241471000 | -1.077501000 |
| 6  | -0.678486000 | 3.498010000  | 0.049125000  |
| 6  | -1.933597000 | 2.872712000  | 0.057685000  |
| 6  | -2.052295000 | 1.486465000  | 0.029220000  |
| 6  | -0.902806000 | 0.689089000  | -0.005690000 |
| 6  | 0.362608000  | 1.321594000  | -0.015677000 |
| 6  | 0.469161000  | 2.721321000  | 0.011078000  |
| 1  | -0.605286000 | 4.581200000  | 0.070555000  |
| 1  | -2.836321000 | 3.477174000  | 0.086512000  |
| 1  | -3.029376000 | 1.019158000  | 0.036493000  |
| 34 | -0.907723000 | -1.228881000 | -0.046284000 |
| 1  | 1.454416000  | 3.175927000  | 0.000599000  |
| 17 | -3.250916000 | -1.514269000 | 0.042648000  |

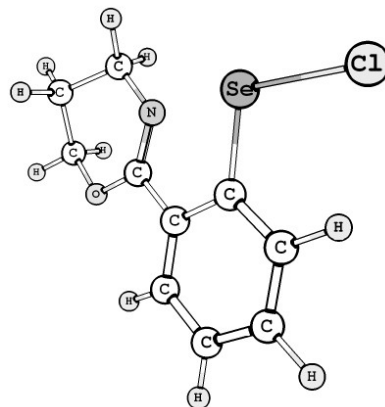

### Optimized geometry of Se complex **1b**

|   |             |              |              |
|---|-------------|--------------|--------------|
| 7 | 1.512468000 | -0.974717000 | -0.104270000 |
| 6 | 2.011093000 | 0.215179000  | -0.055737000 |
| 8 | 3.323484000 | 0.521753000  | -0.025429000 |
| 6 | 4.243609000 | -0.577441000 | -0.214028000 |
| 6 | 3.737204000 | -1.842594000 | 0.467699000  |
| 6 | 2.340985000 | -2.170628000 | -0.071550000 |
| 1 | 5.190643000 | -0.227294000 | 0.200912000  |
| 1 | 4.367582000 | -0.731430000 | -1.293385000 |
| 1 | 3.693348000 | -1.679203000 | 1.550705000  |
| 1 | 4.432305000 | -2.668723000 | 0.282404000  |
| 1 | 1.837525000 | -2.916575000 | 0.552840000  |
| 1 | 2.402834000 | -2.589384000 | -1.084902000 |

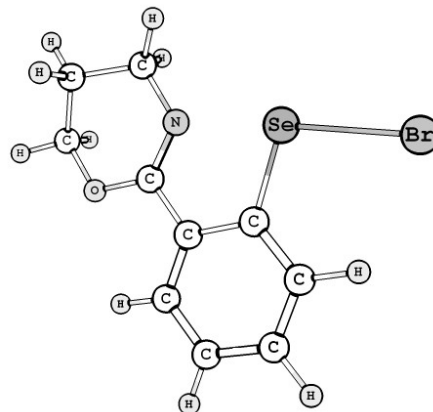

|    |              |              |              |
|----|--------------|--------------|--------------|
| 6  | 0.500986000  | 3.661359000  | 0.049673000  |
| 6  | -0.856469000 | 3.312246000  | 0.054797000  |
| 6  | -1.260712000 | 1.980950000  | 0.023545000  |
| 6  | -0.304686000 | 0.959798000  | -0.011341000 |
| 6  | 1.065145000  | 1.314227000  | -0.017023000 |
| 6  | 1.460387000  | 2.660990000  | 0.012735000  |
| 1  | 0.799682000  | 4.705106000  | 0.073221000  |
| 1  | -1.613969000 | 4.091053000  | 0.083047000  |
| 1  | -2.314265000 | 1.727794000  | 0.029019000  |
| 34 | -0.715333000 | -0.917114000 | -0.057153000 |
| 1  | 2.518907000  | 2.899434000  | 0.005482000  |
| 35 | -3.194105000 | -0.738983000 | 0.029845000  |

Optimized geometry of Se complex **1c**

|    |              |              |              |
|----|--------------|--------------|--------------|
| 7  | 1.877849000  | -1.030034000 | -0.097759000 |
| 6  | 2.488712000  | 0.127992000  | -0.058082000 |
| 8  | 3.854180000  | 0.298835000  | -0.039817000 |
| 6  | 4.684689000  | -0.926993000 | -0.195916000 |
| 6  | 4.016195000  | -2.132663000 | 0.480058000  |
| 6  | 2.591264000  | -2.319268000 | -0.086177000 |
| 1  | 5.642496000  | -0.665211000 | 0.257525000  |
| 1  | 4.820905000  | -1.090844000 | -1.272326000 |
| 1  | 3.968871000  | -1.967626000 | 1.563303000  |
| 1  | 4.618629000  | -3.031757000 | 0.303484000  |
| 1  | 2.014331000  | -3.024515000 | 0.521473000  |
| 1  | 2.624489000  | -2.718437000 | -1.109230000 |
| 6  | 1.277721000  | 3.710710000  | 0.052382000  |
| 6  | -0.116704000 | 3.475708000  | 0.055218000  |
| 6  | -0.636509000 | 2.170758000  | 0.021721000  |
| 6  | 0.240829000  | 1.069797000  | -0.013108000 |
| 6  | 1.645717000  | 1.309908000  | -0.016924000 |
| 6  | 2.160048000  | 2.626544000  | 0.015326000  |
| 1  | 1.659692000  | 4.727437000  | 0.078156000  |
| 1  | -0.806383000 | 4.315683000  | 0.083542000  |
| 1  | -1.710186000 | 2.012669000  | 0.024833000  |
| 34 | -0.314910000 | -0.814372000 | -0.060223000 |
| 1  | 3.236384000  | 2.770480000  | 0.010305000  |
| 53 | -3.197216000 | -0.443295000 | 0.020045000  |

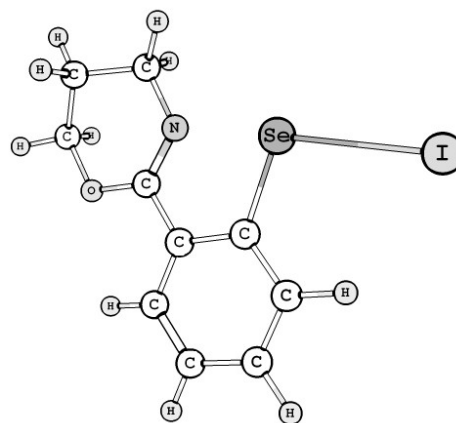

Optimized geometry of Se complex **1d**

|    |              |              |              |
|----|--------------|--------------|--------------|
| 16 | -2.154806000 | -0.278519000 | -1.662425000 |
| 6  | -3.162321000 | -0.392048000 | -0.171945000 |
| 6  | -4.545402000 | -0.223232000 | -0.334516000 |
| 6  | -5.394306000 | -0.296107000 | 0.769029000  |
| 6  | -4.877816000 | -0.535346000 | 2.044448000  |
| 6  | -3.501744000 | -0.703326000 | 2.203141000  |
| 6  | -2.643880000 | -0.633201000 | 1.104536000  |
| 1  | -4.954490000 | -0.035323000 | -1.323960000 |

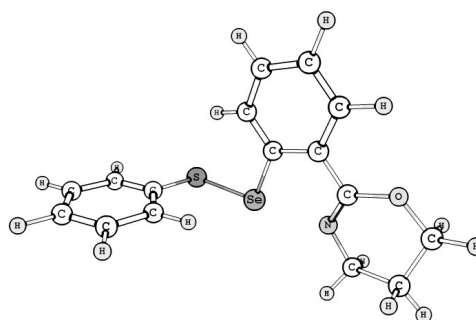

|    |              |              |              |
|----|--------------|--------------|--------------|
| 1  | -6.464320000 | -0.164230000 | 0.628910000  |
| 1  | -5.540810000 | -0.590053000 | 2.903511000  |
| 1  | -3.085391000 | -0.890756000 | 3.189967000  |
| 1  | -1.574647000 | -0.773387000 | 1.227570000  |
| 7  | 2.311099000  | -1.079963000 | -0.251461000 |
| 6  | 2.725467000  | 0.040252000  | 0.210605000  |
| 8  | 3.920714000  | 0.273300000  | 0.811629000  |
| 6  | 4.872412000  | -0.809359000 | 0.775854000  |
| 6  | 4.178807000  | -2.152092000 | 0.967763000  |
| 6  | 3.096436000  | -2.296806000 | -0.106950000 |
| 1  | 5.587878000  | -0.587257000 | 1.570596000  |
| 1  | 5.396959000  | -0.771340000 | -0.187923000 |
| 1  | 3.726325000  | -2.185178000 | 1.965956000  |
| 1  | 4.910861000  | -2.965286000 | 0.906738000  |
| 1  | 2.408121000  | -3.115569000 | 0.131999000  |
| 1  | 3.547158000  | -2.541497000 | -1.078881000 |
| 6  | 1.441646000  | 3.578762000  | 0.447176000  |
| 6  | 0.158274000  | 3.418765000  | -0.081750000 |
| 6  | -0.283356000 | 2.169478000  | -0.512203000 |
| 6  | 0.547763000  | 1.050339000  | -0.422460000 |
| 6  | 1.847458000  | 1.210661000  | 0.110959000  |
| 6  | 2.279861000  | 2.475411000  | 0.539982000  |
| 1  | 1.783287000  | 4.553968000  | 0.781509000  |
| 1  | -0.509057000 | 4.272903000  | -0.161762000 |
| 1  | -1.280960000 | 2.062677000  | -0.923146000 |
| 34 | -0.021602000 | -0.718438000 | -0.999155000 |
| 1  | 3.281258000  | 2.573964000  | 0.944155000  |

#### Optimized geometry of Se complex **1e**

|   |              |              |              |
|---|--------------|--------------|--------------|
| 6 | -2.074550000 | 1.313963000  | 0.053552000  |
| 6 | -3.301300000 | 0.450410000  | 0.067088000  |
| 6 | -3.986482000 | 0.159173000  | -1.120551000 |
| 6 | -5.108678000 | -0.669373000 | -1.112214000 |
| 6 | -5.557410000 | -1.230141000 | 0.084998000  |
| 6 | -4.872310000 | -0.960791000 | 1.271932000  |
| 6 | -3.750091000 | -0.133405000 | 1.260720000  |
| 1 | -3.637640000 | 0.591210000  | -2.055742000 |
| 1 | -5.633227000 | -0.876344000 | -2.041511000 |
| 1 | -6.433239000 | -1.873526000 | 0.093166000  |
| 1 | -5.212410000 | -1.395951000 | 2.208201000  |
| 1 | -3.213417000 | 0.068281000  | 2.184923000  |
| 7 | 1.671249000  | -1.442327000 | -0.250925000 |
| 6 | 2.599891000  | -0.586047000 | -0.065252000 |
| 8 | 3.930792000  | -0.853862000 | 0.102312000  |
| 6 | 4.338314000  | -2.211234000 | -0.140055000 |
| 6 | 3.309987000  | -3.192498000 | 0.406893000  |
| 6 | 1.956457000  | -2.869518000 | -0.233652000 |
| 1 | 5.314000000  | -2.309616000 | 0.342033000  |
| 1 | 4.469671000  | -2.346204000 | -1.222486000 |
| 1 | 3.249435000  | -3.080132000 | 1.496068000  |

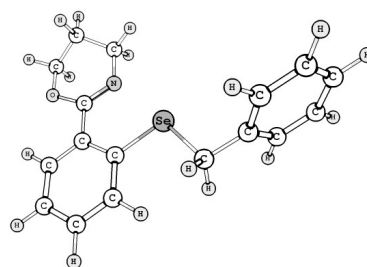

|    |              |              |              |
|----|--------------|--------------|--------------|
| 1  | 3.618655000  | -4.222710000 | 0.194507000  |
| 1  | 1.138038000  | -3.367756000 | 0.299322000  |
| 1  | 1.922794000  | -3.242892000 | -1.267293000 |
| 6  | 3.068453000  | 3.152182000  | 0.140079000  |
| 6  | 1.745553000  | 3.594077000  | 0.107826000  |
| 6  | 0.698982000  | 2.679437000  | 0.021403000  |
| 6  | 0.933805000  | 1.296736000  | -0.031772000 |
| 6  | 2.280803000  | 0.851819000  | -0.002984000 |
| 6  | 3.324216000  | 1.787898000  | 0.082681000  |
| 1  | 3.889042000  | 3.860697000  | 0.205379000  |
| 1  | 1.520977000  | 4.657016000  | 0.147528000  |
| 1  | -0.313451000 | 3.062050000  | -0.004661000 |
| 34 | -0.522532000 | 0.044409000  | -0.137652000 |
| 1  | 4.344034000  | 1.421714000  | 0.102020000  |
| 1  | -2.077710000 | 2.003762000  | -0.793309000 |
| 1  | -1.958385000 | 1.871552000  | 0.985840000  |

Optimized geometry of Se complex **2a**

|    |              |              |              |
|----|--------------|--------------|--------------|
| 34 | 0.617172000  | -1.305939000 | -0.016658000 |
| 17 | 2.710323000  | -2.350331000 | 0.015382000  |
| 8  | -2.133811000 | 1.937083000  | 0.001617000  |
| 7  | -1.332239000 | -0.164025000 | -0.039302000 |
| 6  | 1.259033000  | 0.513522000  | -0.006507000 |
| 6  | 2.611348000  | 0.872456000  | 0.000641000  |
| 1  | 3.373456000  | 0.103017000  | 0.001664000  |
| 6  | 2.972786000  | 2.217299000  | 0.007834000  |
| 1  | 4.028233000  | 2.476283000  | 0.014106000  |
| 6  | 2.008887000  | 3.235305000  | 0.007272000  |
| 1  | 2.311989000  | 4.277871000  | 0.013022000  |
| 6  | 0.664201000  | 2.897545000  | -0.001396000 |
| 1  | -0.108487000 | 3.660218000  | -0.002844000 |
| 6  | 0.288949000  | 1.545583000  | -0.008484000 |
| 6  | -1.079186000 | 1.098817000  | -0.018340000 |
| 6  | -3.316805000 | 1.091326000  | -0.078963000 |
| 1  | -3.813757000 | 1.308504000  | -1.029177000 |
| 1  | -3.976183000 | 1.364335000  | 0.748431000  |
| 6  | -2.790422000 | -0.381382000 | 0.006033000  |
| 6  | -3.163166000 | -1.056433000 | 1.334558000  |
| 1  | -2.668191000 | -2.028795000 | 1.418194000  |
| 1  | -4.246294000 | -1.213338000 | 1.397985000  |
| 1  | -2.849744000 | -0.442427000 | 2.185339000  |
| 6  | -3.235157000 | -1.228104000 | -1.192830000 |
| 1  | -2.772671000 | -2.219161000 | -1.151223000 |
| 1  | -2.940676000 | -0.755203000 | -2.135219000 |
| 1  | -4.323648000 | -1.357832000 | -1.192122000 |

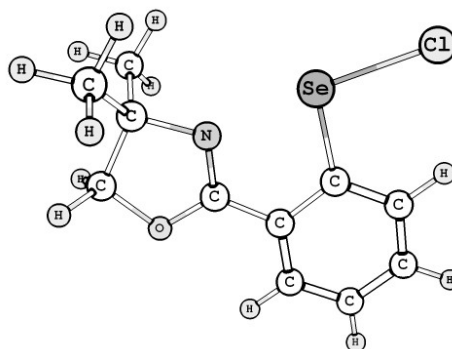

Optimized geometry of Se complex **2b**

|    |             |              |              |
|----|-------------|--------------|--------------|
| 34 | 0.639342000 | -0.873864000 | -0.018312000 |
| 35 | 3.078578000 | -1.206960000 | 0.009519000  |

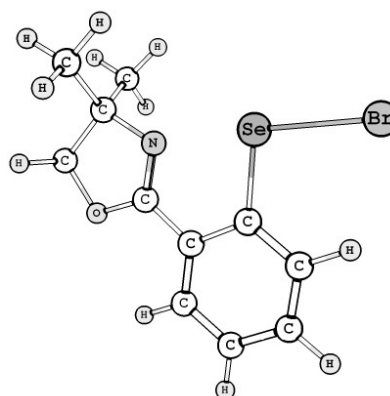

|   |              |              |              |
|---|--------------|--------------|--------------|
| 8 | -3.053509000 | 1.279653000  | 0.010706000  |
| 7 | -1.615566000 | -0.451336000 | -0.035276000 |
| 6 | 0.623252000  | 1.058461000  | -0.007989000 |
| 6 | 1.772593000  | 1.855806000  | -0.002540000 |
| 1 | 2.750345000  | 1.389073000  | -0.002501000 |
| 6 | 1.658556000  | 3.243706000  | 0.004381000  |
| 1 | 2.564431000  | 3.844113000  | 0.008976000  |
| 6 | 0.407117000  | 3.874162000  | 0.005628000  |
| 1 | 0.337712000  | 4.957685000  | 0.010861000  |
| 6 | -0.742925000 | 3.099113000  | -0.000293000 |
| 1 | -1.728409000 | 3.554580000  | 0.000217000  |
| 6 | -0.639503000 | 1.699952000  | -0.007271000 |
| 6 | -1.784240000 | 0.824056000  | -0.013563000 |
| 6 | -3.902578000 | 0.098891000  | -0.050257000 |
| 1 | -4.590944000 | 0.141139000  | 0.797582000  |
| 6 | -2.926886000 | -1.125343000 | 0.004690000  |
| 6 | -3.054714000 | -1.912138000 | 1.317583000  |
| 1 | -2.271992000 | -2.674371000 | 1.380556000  |
| 1 | -2.951073000 | -1.247985000 | 2.182007000  |
| 1 | -4.028946000 | -2.411470000 | 1.376593000  |
| 6 | -3.079727000 | -2.046838000 | -1.212026000 |
| 1 | -2.314634000 | -2.829179000 | -1.193924000 |
| 1 | -4.064217000 | -2.529125000 | -1.211490000 |
| 1 | -2.967801000 | -1.484088000 | -2.144415000 |
| 1 | -4.470987000 | 0.147790000  | -0.983797000 |

#### Optimized geometry of Se complex **2c**

|    |              |              |              |
|----|--------------|--------------|--------------|
| 6  | -0.666246000 | 3.621029000  | 0.000098000  |
| 1  | -1.461385000 | 4.362428000  | 0.000102000  |
| 6  | 0.683964000  | 4.039676000  | -0.000079000 |
| 1  | 0.927409000  | 5.098303000  | -0.000136000 |
| 6  | 1.701899000  | 3.080854000  | -0.000052000 |
| 1  | 2.750203000  | 3.366510000  | -0.000088000 |
| 6  | 1.364587000  | 1.708422000  | 0.000056000  |
| 6  | 0.002636000  | 1.279341000  | 0.000047000  |
| 34 | -0.313212000 | -0.671894000 | 0.000157000  |
| 53 | -3.194157000 | -0.681188000 | -0.000073000 |
| 6  | -1.010214000 | 2.257902000  | 0.000127000  |
| 1  | -2.055223000 | 1.965742000  | 0.000205000  |
| 8  | 3.708457000  | 0.846376000  | -0.000212000 |
| 6  | 2.341346000  | 0.646927000  | 0.000013000  |
| 7  | 1.944291000  | -0.597732000 | 0.000088000  |
| 6  | 3.111105000  | -1.538429000 | -0.000037000 |
| 6  | 3.085753000  | -2.407922000 | -1.274090000 |
| 1  | 2.187588000  | -3.034900000 | -1.291292000 |
| 1  | 3.083090000  | -1.784680000 | -2.175949000 |
| 1  | 3.964489000  | -3.065130000 | -1.304207000 |
| 6  | 4.323332000  | -0.525444000 | -0.000420000 |
| 1  | 4.941166000  | -0.596396000 | 0.898017000  |
| 1  | 4.940606000  | -0.596381000 | -0.899253000 |

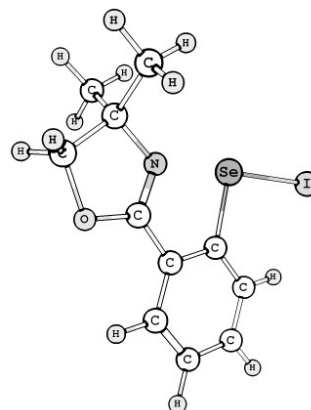

|   |             |              |             |
|---|-------------|--------------|-------------|
| 6 | 3.086299000 | -2.407618000 | 1.274325000 |
| 1 | 3.084170000 | -1.784060000 | 2.175961000 |
| 1 | 2.188024000 | -3.034419000 | 1.292134000 |
| 1 | 3.964938000 | -3.064965000 | 1.304208000 |

Optimized geometry of Se complex **2d**

|    |              |              |              |
|----|--------------|--------------|--------------|
| 34 | -0.096074000 | -0.583279000 | -0.922767000 |
| 16 | -2.202384000 | -0.354842000 | -1.679481000 |
| 8  | 3.763872000  | 0.768727000  | 0.877811000  |
| 7  | 2.361981000  | -0.736669000 | -0.063620000 |
| 6  | -3.263971000 | -0.533367000 | -0.230366000 |
| 6  | -4.646004000 | -0.501691000 | -0.464757000 |
| 1  | -5.022079000 | -0.377791000 | -1.477205000 |
| 6  | -5.537040000 | -0.630110000 | 0.599930000  |
| 1  | -6.606528000 | -0.604992000 | 0.406949000  |
| 6  | -5.062459000 | -0.789856000 | 1.903692000  |
| 1  | -5.758552000 | -0.888593000 | 2.732003000  |
| 6  | -3.686289000 | -0.821770000 | 2.131769000  |
| 1  | -3.303376000 | -0.946404000 | 3.141620000  |
| 6  | -2.785745000 | -0.694384000 | 1.073080000  |
| 1  | -1.715033000 | -0.728828000 | 1.248226000  |
| 6  | 4.539441000  | -0.454002000 | 0.829896000  |
| 1  | 4.897407000  | -0.665300000 | 1.841375000  |
| 1  | 5.397608000  | -0.283061000 | 0.171532000  |
| 6  | 3.555915000  | -1.536203000 | 0.277898000  |
| 6  | 3.175987000  | -2.571020000 | 1.348068000  |
| 1  | 2.797628000  | -2.077752000 | 2.249909000  |
| 1  | 4.044565000  | -3.180858000 | 1.625079000  |
| 1  | 2.392427000  | -3.235540000 | 0.971009000  |
| 6  | 4.099112000  | -2.223951000 | -0.980887000 |
| 1  | 3.352828000  | -2.911791000 | -1.390485000 |
| 1  | 5.005883000  | -2.796197000 | -0.750366000 |
| 1  | 4.341077000  | -1.486434000 | -1.753277000 |
| 6  | 2.563843000  | 0.470419000  | 0.309798000  |
| 6  | 1.579498000  | 1.535790000  | 0.166319000  |
| 6  | 1.890579000  | 2.843678000  | 0.570507000  |
| 1  | 2.873980000  | 3.039322000  | 0.984615000  |
| 6  | 0.957194000  | 3.864078000  | 0.442750000  |
| 1  | 1.203975000  | 4.873494000  | 0.758081000  |
| 6  | -0.299447000 | 3.574959000  | -0.094772000 |
| 1  | -1.040951000 | 4.362410000  | -0.201077000 |
| 6  | -0.621068000 | 2.280765000  | -0.500152000 |
| 1  | -1.600000000 | 2.077424000  | -0.919633000 |
| 6  | 0.306944000  | 1.244455000  | -0.377724000 |

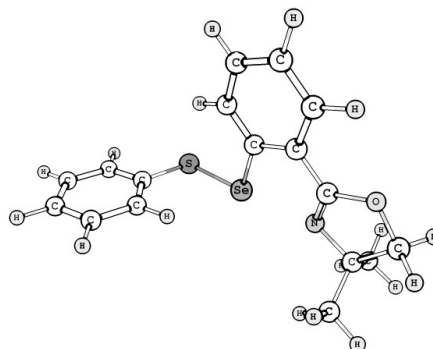

Optimized geometry of Se complex **2e**

|    |              |              |              |
|----|--------------|--------------|--------------|
| 34 | 0.581203000  | 0.210166000  | -0.040676000 |
| 6  | 2.200152000  | 1.392667000  | -0.002327000 |
| 8  | -3.911301000 | -0.504413000 | 0.053423000  |

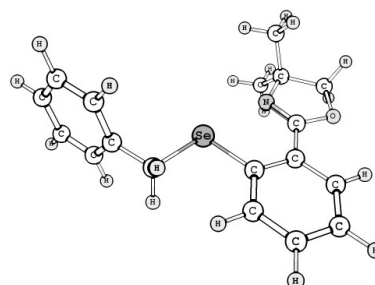

|   |              |              |              |
|---|--------------|--------------|--------------|
| 7 | -1.766684000 | -1.232705000 | -0.042587000 |
| 6 | 3.382246000  | 0.467103000  | 0.012514000  |
| 6 | 3.858938000  | -0.059594000 | 1.221326000  |
| 1 | 3.378022000  | 0.228721000  | 2.153198000  |
| 6 | 4.938662000  | -0.941715000 | 1.236963000  |
| 1 | 5.302068000  | -1.332988000 | 2.183670000  |
| 6 | 5.551159000  | -1.321601000 | 0.040724000  |
| 1 | 6.393928000  | -2.007592000 | 0.052169000  |
| 6 | 5.073409000  | -0.816473000 | -1.170016000 |
| 1 | 5.542031000  | -1.109511000 | -2.105920000 |
| 6 | 3.993577000  | 0.066402000  | -1.183192000 |
| 1 | 3.620983000  | 0.454753000  | -2.128313000 |
| 6 | -4.035276000 | -1.943627000 | 0.021094000  |
| 1 | -4.616375000 | -2.214409000 | -0.866655000 |
| 1 | -4.582233000 | -2.257412000 | 0.915899000  |
| 6 | -2.565523000 | -2.473106000 | -0.021558000 |
| 6 | -2.280093000 | -3.284384000 | -1.293241000 |
| 1 | -2.524696000 | -2.702360000 | -2.188253000 |
| 1 | -2.872061000 | -4.207884000 | -1.307486000 |
| 1 | -1.219878000 | -3.551470000 | -1.342058000 |
| 6 | -2.207224000 | -3.283044000 | 1.233242000  |
| 1 | -1.144259000 | -3.543444000 | 1.224836000  |
| 1 | -2.792449000 | -4.209791000 | 1.279006000  |
| 1 | -2.406590000 | -2.702211000 | 2.140220000  |
| 6 | -2.569442000 | -0.239601000 | 0.004184000  |
| 6 | -2.171985000 | 1.168538000  | 0.010455000  |
| 6 | -3.171802000 | 2.154357000  | 0.036231000  |
| 1 | -4.208075000 | 1.835622000  | 0.052355000  |
| 6 | -2.850015000 | 3.505526000  | 0.040809000  |
| 1 | -3.634773000 | 4.255855000  | 0.060564000  |
| 6 | -1.505770000 | 3.879524000  | 0.018503000  |
| 1 | -1.230074000 | 4.931065000  | 0.020277000  |
| 6 | -0.502463000 | 2.913464000  | -0.007093000 |
| 1 | 0.527788000  | 3.246294000  | -0.024935000 |
| 6 | -0.803964000 | 1.543128000  | -0.010428000 |
| 1 | 2.195886000  | 2.028106000  | -0.890732000 |
| 1 | 2.159525000  | 2.011857000  | 0.896732000  |

Optimized geometry of Se complex **3a**

|   |              |              |              |
|---|--------------|--------------|--------------|
| 6 | 0.908620000  | 5.073805000  | 0.008195000  |
| 6 | 2.144860000  | 4.379167000  | 0.010649000  |
| 6 | 2.172401000  | 3.004749000  | 0.005061000  |
| 6 | 0.964058000  | 2.247677000  | -0.002955000 |
| 6 | -0.285223000 | 2.953652000  | -0.007417000 |
| 6 | -0.275497000 | 4.376779000  | -0.000839000 |
| 6 | 0.955308000  | 0.821782000  | -0.009077000 |
| 6 | 2.261343000  | 0.087564000  | -0.009251000 |
| 6 | 2.877673000  | -0.257936000 | -1.218848000 |
| 6 | 4.109706000  | -0.918186000 | -1.235993000 |
| 6 | 4.757738000  | -1.318593000 | -2.541796000 |

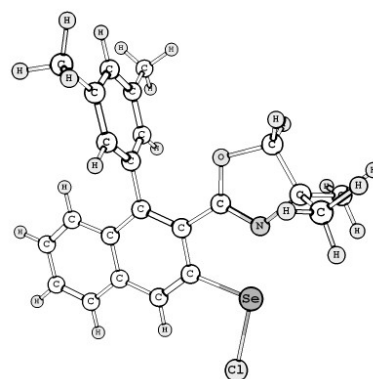



|    |              |              |              |
|----|--------------|--------------|--------------|
| 1  | 4.613156000  | -2.387721000 | -2.746921000 |
| 1  | 4.335321000  | -0.763465000 | -3.385430000 |
| 1  | 5.838531000  | -1.138083000 | -2.525555000 |
| 6  | 4.723321000  | -1.219227000 | -0.013114000 |
| 6  | 4.136495000  | -0.877685000 | 1.209162000  |
| 6  | 4.832549000  | -1.179201000 | 2.516813000  |
| 1  | 5.539490000  | -2.008897000 | 2.412831000  |
| 1  | 5.399896000  | -0.310024000 | 2.875575000  |
| 1  | 4.114960000  | -1.441405000 | 3.301942000  |
| 6  | 2.898782000  | -0.222323000 | 1.195958000  |
| 6  | -0.270990000 | 0.150788000  | -0.018513000 |
| 6  | -1.520868000 | 0.865375000  | -0.023347000 |
| 34 | -3.155715000 | -0.174485000 | -0.039994000 |
| 17 | -4.659237000 | 1.640806000  | 0.020914000  |
| 6  | -1.505956000 | 2.240431000  | -0.019073000 |
| 8  | 0.567942000  | -2.186188000 | 0.044728000  |
| 6  | -0.433701000 | -1.289858000 | -0.022067000 |
| 7  | -1.628632000 | -1.773431000 | -0.071033000 |
| 6  | -1.589861000 | -3.241420000 | 0.037845000  |
| 6  | -0.054084000 | -3.496655000 | -0.076396000 |
| 6  | -2.152217000 | -3.656940000 | 1.406746000  |
| 1  | 0.901443000  | 6.160422000  | 0.013043000  |
| 1  | 3.075837000  | 4.939335000  | 0.016814000  |
| 1  | 3.120801000  | 2.479389000  | 0.006496000  |
| 1  | -1.227927000 | 4.900236000  | -0.003409000 |
| 1  | 2.386679000  | -0.009077000 | -2.156673000 |
| 1  | 5.685227000  | -1.729694000 | -0.014449000 |
| 1  | 2.424373000  | 0.051668000  | 2.135459000  |
| 1  | -2.438495000 | 2.792633000  | -0.022318000 |
| 1  | 0.346528000  | -4.127094000 | 0.720386000  |
| 1  | 0.232760000  | -3.908746000 | -1.049142000 |
| 1  | -2.139110000 | -4.747674000 | 1.515489000  |
| 1  | -3.184349000 | -3.309596000 | 1.513791000  |
| 1  | -1.562509000 | -3.218745000 | 2.218879000  |
| 6  | -2.380434000 | -3.882498000 | -1.108152000 |
| 1  | -3.435685000 | -3.598260000 | -1.047788000 |
| 1  | -1.995764000 | -3.554738000 | -2.079179000 |
| 1  | -2.317088000 | -4.975634000 | -1.057734000 |

Optimized geometry of Se complex **3b**

|   |              |              |              |
|---|--------------|--------------|--------------|
| 6 | 0.528242000  | 5.080270000  | 0.021371000  |
| 6 | 1.852774000  | 4.574316000  | 0.023778000  |
| 6 | 2.081736000  | 3.218629000  | 0.014548000  |
| 6 | 0.997518000  | 2.292727000  | 0.003593000  |
| 6 | -0.341010000 | 2.808072000  | -0.001372000 |
| 6 | -0.540784000 | 4.216935000  | 0.008600000  |
| 6 | 1.196716000  | 0.880487000  | -0.004889000 |
| 6 | 2.596808000  | 0.346177000  | -0.011663000 |
| 6 | 3.247746000  | 0.090886000  | -1.222231000 |
| 6 | 4.562987000  | -0.390414000 | -1.246415000 |

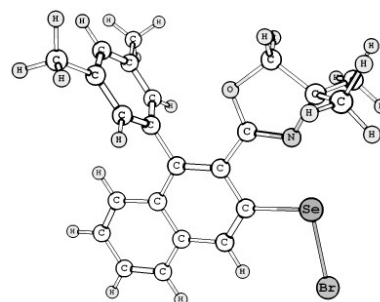

|    |              |              |              |
|----|--------------|--------------|--------------|
| 6  | 5.244585000  | -0.695002000 | -2.560972000 |
| 1  | 4.912130000  | -1.659151000 | -2.968353000 |
| 1  | 5.019406000  | 0.067113000  | -3.315419000 |
| 1  | 6.332148000  | -0.746089000 | -2.446228000 |
| 6  | 5.218333000  | -0.600515000 | -0.029645000 |
| 6  | 4.595364000  | -0.341920000 | 1.198566000  |
| 6  | 5.341085000  | -0.546260000 | 2.497611000  |
| 1  | 5.949474000  | -1.457416000 | 2.471712000  |
| 1  | 6.022690000  | 0.290196000  | 2.701758000  |
| 1  | 4.654100000  | -0.622123000 | 3.346539000  |
| 6  | 3.280620000  | 0.131961000  | 1.192294000  |
| 6  | 0.082420000  | 0.036250000  | -0.015500000 |
| 6  | -1.259102000 | 0.560496000  | -0.024549000 |
| 34 | -2.729791000 | -0.707362000 | -0.049251000 |
| 35 | -4.607754000 | 0.913247000  | 0.004930000  |
| 6  | -1.443430000 | 1.923053000  | -0.017988000 |
| 8  | 1.270265000  | -2.140991000 | 0.072032000  |
| 6  | 0.139642000  | -1.414271000 | -0.013238000 |
| 7  | -0.963294000 | -2.078149000 | -0.070504000 |
| 6  | -0.694997000 | -3.520917000 | 0.049124000  |
| 6  | 0.864332000  | -3.534572000 | -0.029654000 |
| 6  | -1.216632000 | -4.016050000 | 1.407677000  |
| 1  | 0.361898000  | 6.154094000  | 0.028964000  |
| 1  | 2.691604000  | 5.264871000  | 0.032702000  |
| 1  | 3.097054000  | 2.838338000  | 0.015769000  |
| 1  | -1.559960000 | 4.594341000  | 0.005558000  |
| 1  | 2.721047000  | 0.266097000  | -2.157622000 |
| 1  | 6.242239000  | -0.971055000 | -0.036596000 |
| 1  | 2.777119000  | 0.336974000  | 2.134037000  |
| 1  | -2.446282000 | 2.335161000  | -0.022752000 |
| 1  | 1.340240000  | -4.077677000 | 0.789946000  |
| 1  | 1.235235000  | -3.917353000 | -0.985791000 |
| 1  | -1.032635000 | -5.090409000 | 1.524645000  |
| 1  | -2.293248000 | -3.837541000 | 1.487835000  |
| 1  | -0.724248000 | -3.486741000 | 2.230319000  |
| 6  | -1.348943000 | -4.283034000 | -1.109155000 |
| 1  | -2.437041000 | -4.170438000 | -1.072647000 |
| 1  | -1.000195000 | -3.901352000 | -2.074055000 |
| 1  | -1.113598000 | -5.352046000 | -1.050379000 |

### Optimized geometry of Se complex **3c**

|   |              |             |              |
|---|--------------|-------------|--------------|
| 6 | 0.554004000  | 5.083281000 | 0.006208000  |
| 6 | 1.924166000  | 4.675565000 | 0.008501000  |
| 6 | 2.256705000  | 3.329333000 | 0.007842000  |
| 6 | 1.237241000  | 2.318964000 | 0.004567000  |
| 6 | -0.144492000 | 2.735182000 | 0.003085000  |
| 6 | -0.455602000 | 4.133087000 | 0.003797000  |
| 6 | 1.550781000  | 0.919076000 | 0.003702000  |
| 6 | 2.990569000  | 0.487208000 | 0.005158000  |
| 6 | 3.684925000  | 0.328843000 | -1.212707000 |

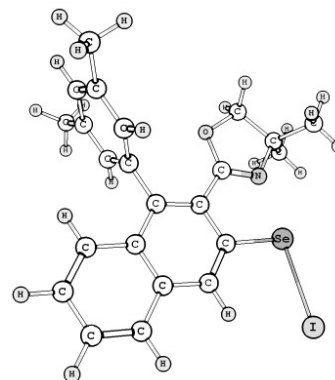

|    |              |              |              |
|----|--------------|--------------|--------------|
| 6  | 5.040883000  | -0.051707000 | -1.228278000 |
| 6  | 5.779689000  | -0.247717000 | -2.540785000 |
| 1  | 5.869099000  | -1.315384000 | -2.788310000 |
| 1  | 5.257357000  | 0.240089000  | -3.371741000 |
| 1  | 6.796984000  | 0.160967000  | -2.493675000 |
| 6  | 5.698284000  | -0.260119000 | 0.005221000  |
| 6  | 5.029065000  | -0.100515000 | 1.235007000  |
| 6  | 5.744963000  | -0.341399000 | 2.552866000  |
| 1  | 6.829841000  | -0.411247000 | 2.413513000  |
| 1  | 5.547452000  | 0.466010000  | 3.269671000  |
| 1  | 5.409312000  | -1.278496000 | 3.019509000  |
| 6  | 3.669753000  | 0.281091000  | 1.219852000  |
| 6  | 0.495574000  | -0.011969000 | 0.000865000  |
| 6  | -0.891874000 | 0.412738000  | 0.000384000  |
| 34 | -2.273740000 | -1.009602000 | -0.003784000 |
| 53 | -4.665069000 | 0.645807000  | 0.003070000  |
| 6  | -1.187787000 | 1.764535000  | 0.001436000  |
| 8  | 1.842424000  | -2.148890000 | -0.008635000 |
| 6  | 0.649723000  | -1.456161000 | -0.005184000 |
| 7  | -0.425333000 | -2.202985000 | -0.009132000 |
| 6  | -0.092123000 | -3.661003000 | -0.012436000 |
| 6  | 1.483096000  | -3.607347000 | -0.026683000 |
| 6  | -0.637426000 | -4.329545000 | 1.267215000  |
| 1  | 0.308798000  | 6.142435000  | 0.006668000  |
| 1  | 2.706830000  | 5.429909000  | 0.010922000  |
| 1  | 3.298705000  | 3.026358000  | 0.009978000  |
| 1  | -1.500140000 | 4.434861000  | 0.002493000  |
| 1  | 3.162870000  | 0.502555000  | -2.151562000 |
| 1  | 6.749440000  | -0.546790000 | 0.004971000  |
| 1  | 3.138702000  | 0.417231000  | 2.160283000  |
| 1  | -2.218839000 | 2.105241000  | 0.000849000  |
| 1  | 1.937968000  | -4.055215000 | 0.860103000  |
| 1  | 1.919775000  | -4.028351000 | -0.935717000 |
| 1  | -0.352089000 | -5.389188000 | 1.292812000  |
| 1  | -1.730759000 | -4.267790000 | 1.296671000  |
| 1  | -0.244761000 | -3.839212000 | 2.165621000  |
| 6  | -0.660132000 | -4.331385000 | -1.280769000 |
| 1  | -1.754219000 | -4.276348000 | -1.287269000 |
| 1  | -0.289282000 | -3.837863000 | -2.186582000 |
| 1  | -0.369214000 | -5.389314000 | -1.313437000 |

### Optimized geometry of Se complex **3d**

|   |              |              |              |
|---|--------------|--------------|--------------|
| 6 | -0.527077000 | 3.969568000  | -1.260254000 |
| 6 | -0.169029000 | 2.622099000  | -0.983033000 |
| 6 | 1.156889000  | 2.327808000  | -0.528858000 |
| 6 | 2.079573000  | 3.404785000  | -0.397044000 |
| 6 | 1.702833000  | 4.698871000  | -0.676187000 |
| 6 | 0.385417000  | 4.987000000  | -1.107945000 |
| 6 | 1.508726000  | 0.968775000  | -0.247693000 |
| 6 | 0.559478000  | -0.039750000 | -0.426234000 |

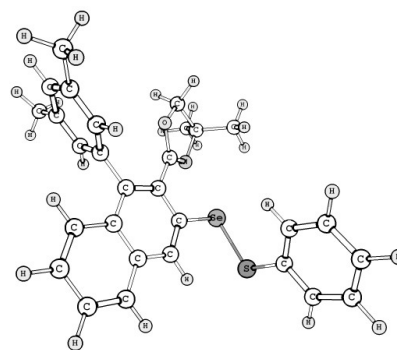

|    |              |              |              |
|----|--------------|--------------|--------------|
| 6  | -0.759390000 | 0.266106000  | -0.905490000 |
| 6  | -1.097004000 | 1.569491000  | -1.168931000 |
| 6  | 2.912521000  | 0.659441000  | 0.172537000  |
| 6  | 4.673269000  | 0.702308000  | 1.855669000  |
| 6  | 3.357781000  | 0.964304000  | 1.466525000  |
| 6  | 5.548824000  | 0.137068000  | 0.917860000  |
| 6  | 3.808475000  | 0.097014000  | -0.741317000 |
| 6  | 5.135436000  | -0.173094000 | -0.380257000 |
| 6  | 5.143998000  | 1.005848000  | 3.259767000  |
| 6  | 6.089450000  | -0.795738000 | -1.374285000 |
| 6  | 0.833188000  | -1.454242000 | -0.138782000 |
| 6  | 1.770019000  | -3.242214000 | 0.820907000  |
| 8  | 1.706255000  | -1.795292000 | 0.842821000  |
| 6  | 0.558840000  | -3.671663000 | -0.057060000 |
| 7  | 0.200683000  | -2.402663000 | -0.725542000 |
| 6  | 0.934789000  | -4.734696000 | -1.093261000 |
| 6  | -0.641226000 | -4.123215000 | 0.792700000  |
| 34 | -2.042264000 | -1.191549000 | -1.157256000 |
| 16 | -3.971743000 | -0.042196000 | -1.347170000 |
| 6  | -4.511998000 | 0.281891000  | 0.343449000  |
| 6  | -4.283825000 | 0.194003000  | 2.748156000  |
| 6  | -3.788757000 | -0.099063000 | 1.476912000  |
| 6  | -5.496962000 | 0.866352000  | 2.901567000  |
| 6  | -5.731512000 | 0.957404000  | 0.492460000  |
| 6  | -6.218095000 | 1.245217000  | 1.767110000  |
| 1  | -1.538751000 | 4.177839000  | -1.599028000 |
| 1  | 3.092037000  | 3.193834000  | -0.072629000 |
| 1  | 2.422019000  | 5.506174000  | -0.568002000 |
| 1  | 0.100084000  | 6.013120000  | -1.323722000 |
| 1  | -2.094978000 | 1.811749000  | -1.520329000 |
| 1  | 2.663161000  | 1.404479000  | 2.177688000  |
| 1  | 6.579775000  | -0.060542000 | 1.207590000  |
| 1  | 3.469910000  | -0.123279000 | -1.751354000 |
| 1  | 6.124062000  | 1.496975000  | 3.257307000  |
| 1  | 4.440392000  | 1.658885000  | 3.785712000  |
| 1  | 5.246230000  | 0.087380000  | 3.852713000  |
| 1  | 5.977708000  | -0.351888000 | -2.369997000 |
| 1  | 5.908034000  | -1.873595000 | -1.480886000 |
| 1  | 7.131273000  | -0.668746000 | -1.062872000 |
| 1  | 1.722083000  | -3.594497000 | 1.854030000  |
| 1  | 2.731866000  | -3.530629000 | 0.381290000  |
| 1  | 1.248296000  | -5.663468000 | -0.601452000 |
| 1  | 1.754547000  | -4.384992000 | -1.729548000 |
| 1  | 0.078299000  | -4.959711000 | -1.736505000 |
| 1  | -1.527938000 | -4.243124000 | 0.163251000  |
| 1  | -0.872752000 | -3.379720000 | 1.562725000  |
| 1  | -0.430701000 | -5.080157000 | 1.285199000  |
| 1  | -3.712419000 | -0.106802000 | 3.622883000  |
| 1  | -2.850509000 | -0.629403000 | 1.350775000  |
| 1  | -5.877039000 | 1.093640000  | 3.893709000  |
| 1  | -6.297311000 | 1.256489000  | -0.386309000 |

1 -7.165104000 1.768709000 1.871486000

Optimized geometry of Se complex **3e**

|    |              |              |              |
|----|--------------|--------------|--------------|
| 6  | -1.229928000 | 3.800040000  | -1.867744000 |
| 6  | -0.788363000 | 2.512635000  | -1.458262000 |
| 6  | 0.524721000  | 2.365140000  | -0.902766000 |
| 6  | 1.347072000  | 3.521933000  | -0.804977000 |
| 6  | 0.890162000  | 4.755643000  | -1.212547000 |
| 6  | -0.412823000 | 4.899571000  | -1.745541000 |
| 6  | 0.967574000  | 1.061294000  | -0.499596000 |
| 6  | 0.122178000  | -0.028207000 | -0.663513000 |
| 6  | -1.186848000 | 0.128475000  | -1.206343000 |
| 6  | -1.614445000 | 1.371284000  | -1.608451000 |
| 6  | 2.335426000  | 0.869139000  | 0.074089000  |
| 6  | 3.934874000  | 1.211185000  | 1.882808000  |
| 6  | 2.662584000  | 1.391863000  | 1.334254000  |
| 6  | 4.888955000  | 0.502573000  | 1.139828000  |
| 6  | 3.306683000  | 0.158214000  | -0.640095000 |
| 6  | 4.594481000  | -0.027562000 | -0.119515000 |
| 6  | 4.270275000  | 1.741852000  | 3.258100000  |
| 6  | 5.647082000  | -0.758862000 | -0.921533000 |
| 6  | 0.551122000  | -1.394229000 | -0.263813000 |
| 6  | 1.087001000  | -2.998970000 | 1.199850000  |
| 8  | 0.618467000  | -1.634931000 | 1.078237000  |
| 6  | 1.061327000  | -3.554488000 | -0.257238000 |
| 7  | 0.802663000  | -2.344293000 | -1.074477000 |
| 6  | 2.399748000  | -4.181610000 | -0.660841000 |
| 6  | -0.100593000 | -4.536525000 | -0.478333000 |
| 34 | -2.312120000 | -1.426094000 | -1.366057000 |
| 6  | -4.002569000 | -0.699867000 | -0.616628000 |
| 6  | -3.914802000 | -0.143670000 | 0.786055000  |
| 6  | -3.044353000 | -0.193898000 | 3.051359000  |
| 6  | -3.048347000 | -0.681989000 | 1.745773000  |
| 6  | -3.899023000 | 0.847903000  | 3.418334000  |
| 6  | -4.757791000 | 0.911397000  | 1.158890000  |
| 6  | -4.754207000 | 1.402496000  | 2.465501000  |
| 1  | -2.229797000 | 3.897576000  | -2.283898000 |
| 1  | 2.350552000  | 3.421335000  | -0.407005000 |
| 1  | 1.536600000  | 5.625177000  | -1.129676000 |
| 1  | -0.762334000 | 5.878430000  | -2.062677000 |
| 1  | -2.600164000 | 1.498718000  | -2.046699000 |
| 1  | 1.905918000  | 1.932916000  | 1.897019000  |
| 1  | 5.885644000  | 0.360429000  | 1.555018000  |
| 1  | 3.054145000  | -0.253202000 | -1.613702000 |
| 1  | 5.274384000  | 2.180441000  | 3.285188000  |
| 1  | 3.557210000  | 2.509208000  | 3.576025000  |
| 1  | 4.247738000  | 0.942026000  | 4.010208000  |
| 1  | 6.117267000  | -0.094961000 | -1.659226000 |
| 1  | 5.216253000  | -1.600084000 | -1.475826000 |
| 1  | 6.443483000  | -1.147718000 | -0.278352000 |

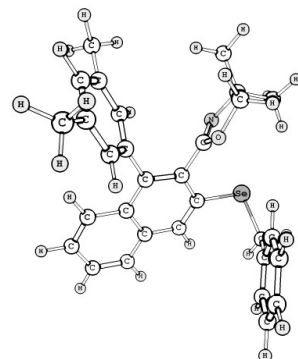

|   |              |              |              |
|---|--------------|--------------|--------------|
| 1 | 0.417289000  | -3.526048000 | 1.885024000  |
| 1 | 2.095393000  | -2.971957000 | 1.627850000  |
| 1 | 2.611791000  | -5.074288000 | -0.059210000 |
| 1 | 3.219502000  | -3.468434000 | -0.521214000 |
| 1 | 2.378346000  | -4.474800000 | -1.715288000 |
| 1 | -0.133212000 | -4.851853000 | -1.526267000 |
| 1 | -1.055023000 | -4.054060000 | -0.244603000 |
| 1 | 0.014897000  | -5.428365000 | 0.150036000  |
| 1 | -2.361322000 | -0.621692000 | 3.780657000  |
| 1 | -2.355296000 | -1.461207000 | 1.445655000  |
| 1 | -3.890746000 | 1.230997000  | 4.435379000  |
| 1 | -5.428020000 | 1.348805000  | 0.421605000  |
| 1 | -5.415453000 | 2.222057000  | 2.735188000  |
| 1 | -4.426348000 | 0.028398000  | -1.312016000 |
| 1 | -4.646050000 | -1.587724000 | -0.650444000 |

**Figure S1:** Molecular plots of the compounds **1a – 1e**, **2a – 2e** and **3a – 3e** obtained from AIM theory. The Bond Critical points (BCP) and Ring Critical Points (RCP) are shown in small spheres in Red and Yellow color respectively.

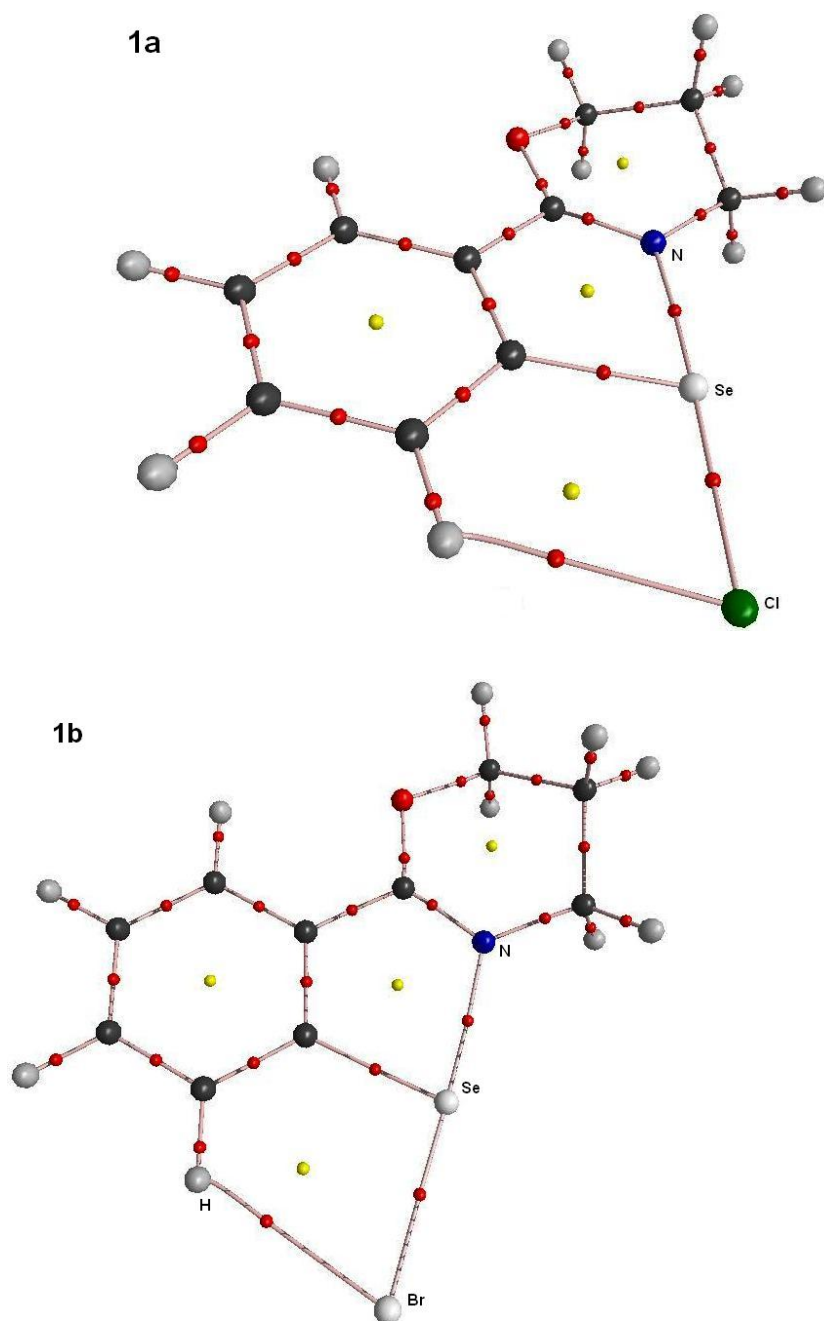

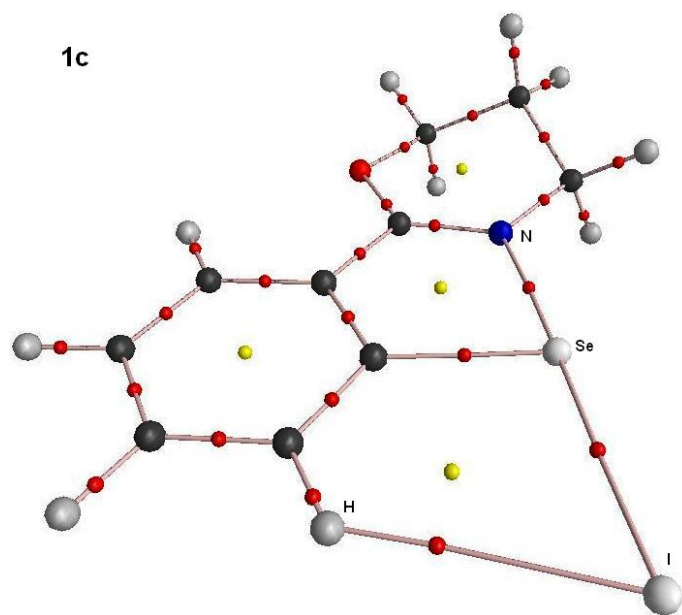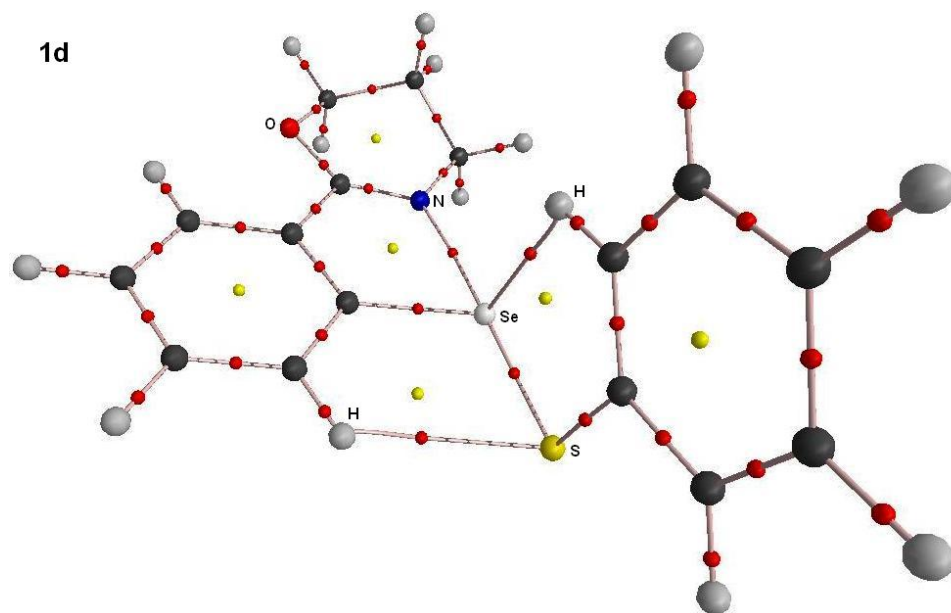



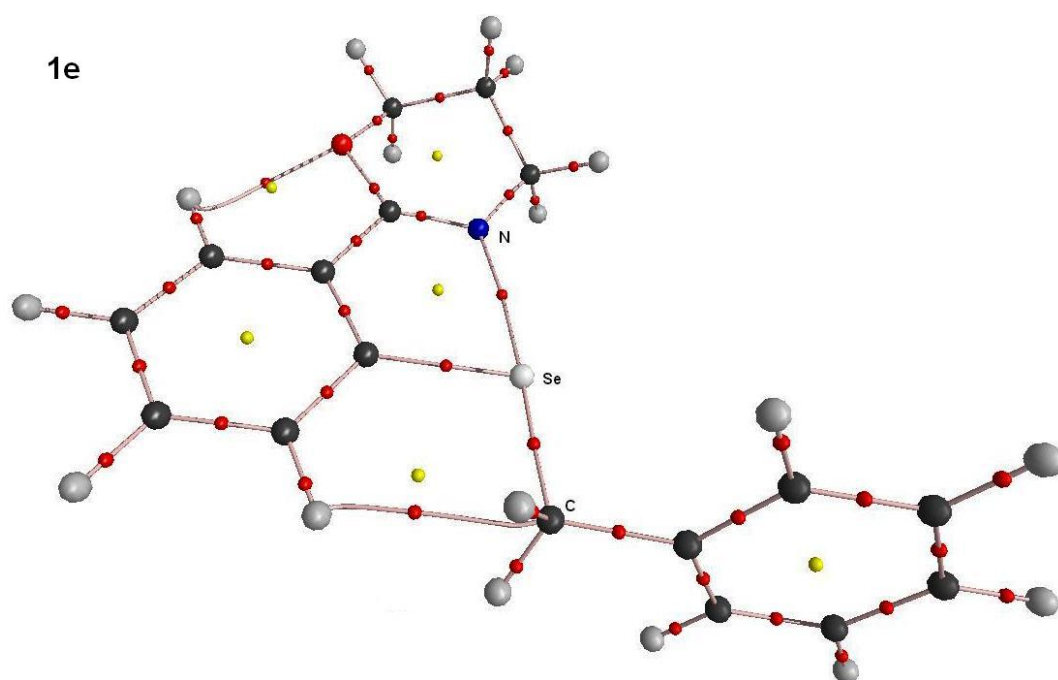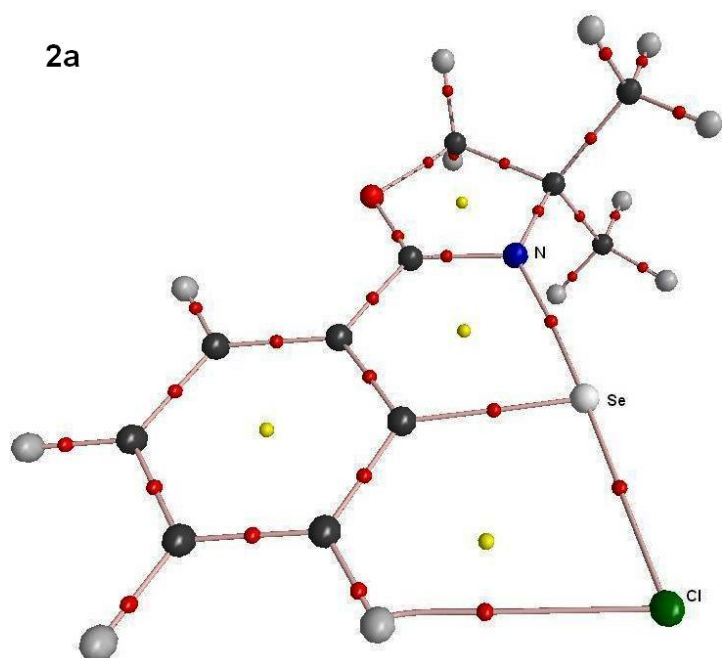

2b

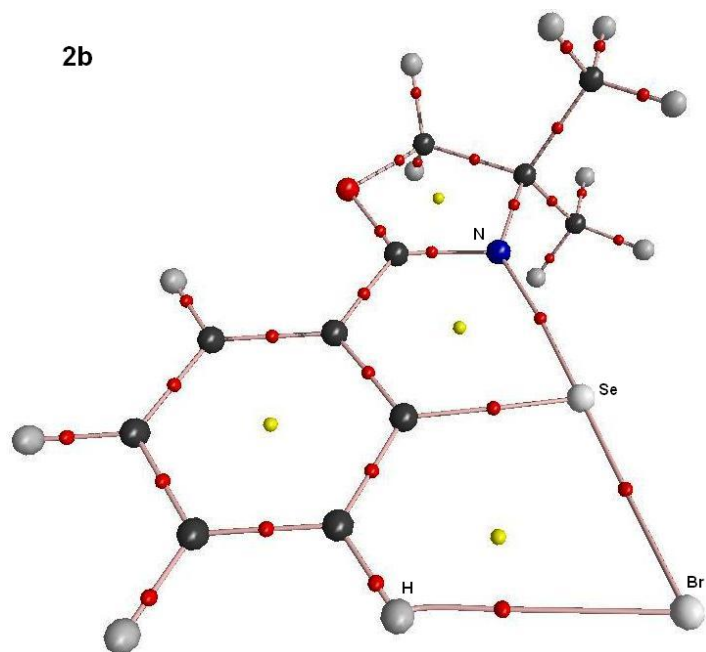

2c

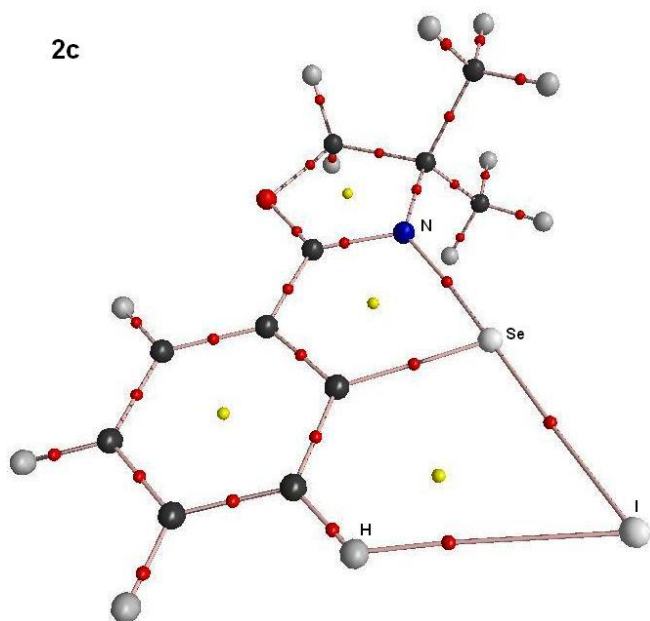

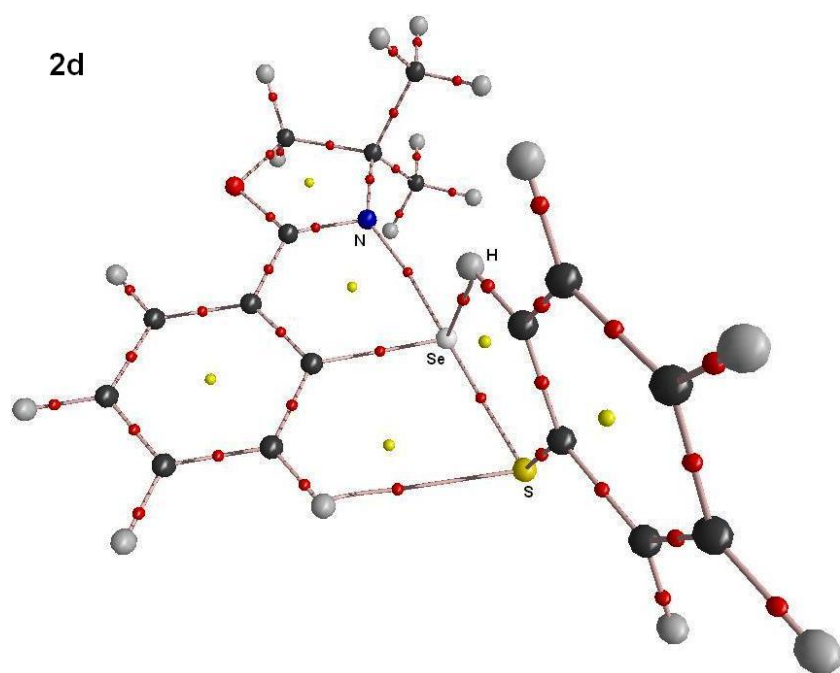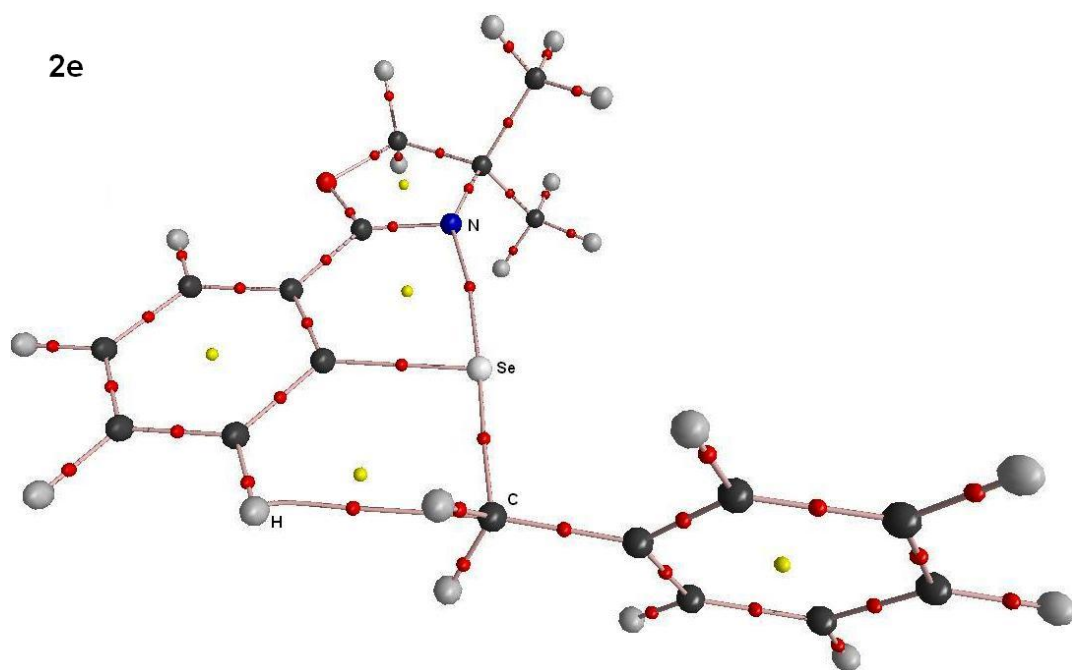

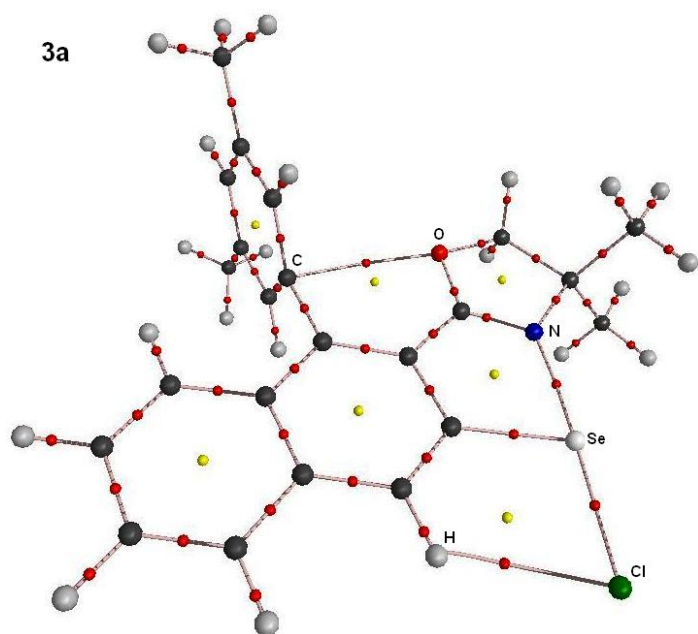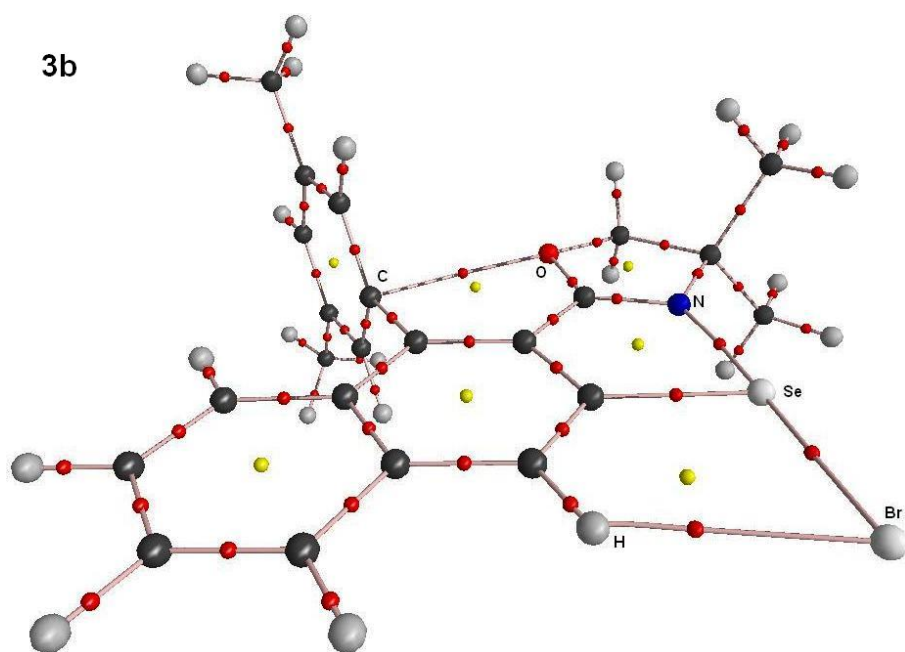

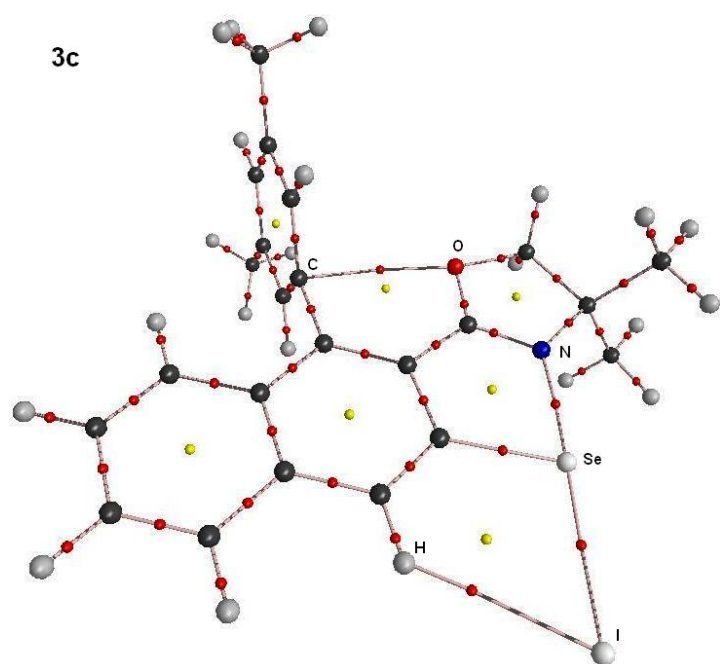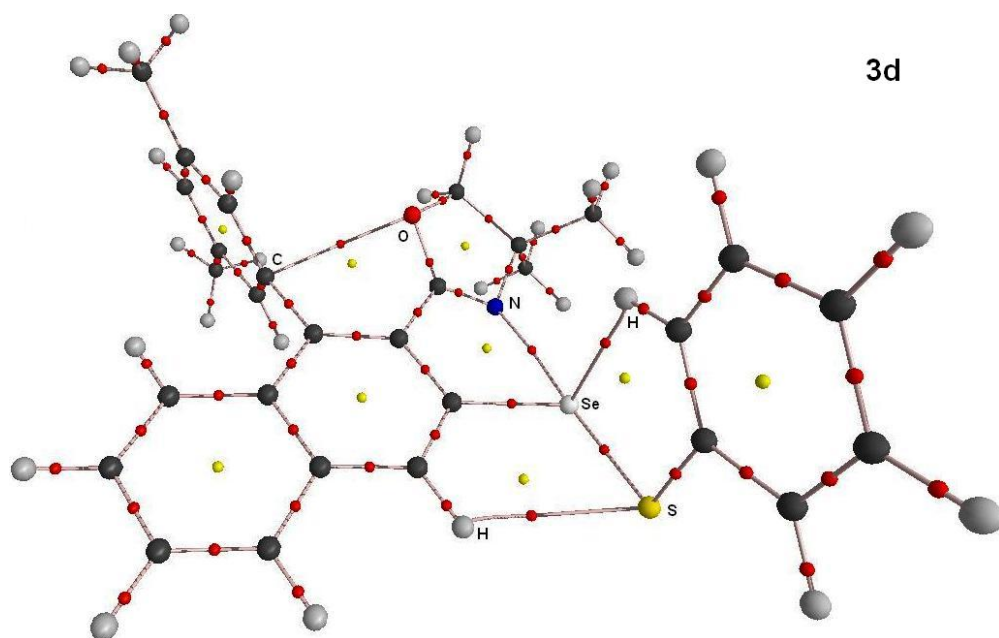

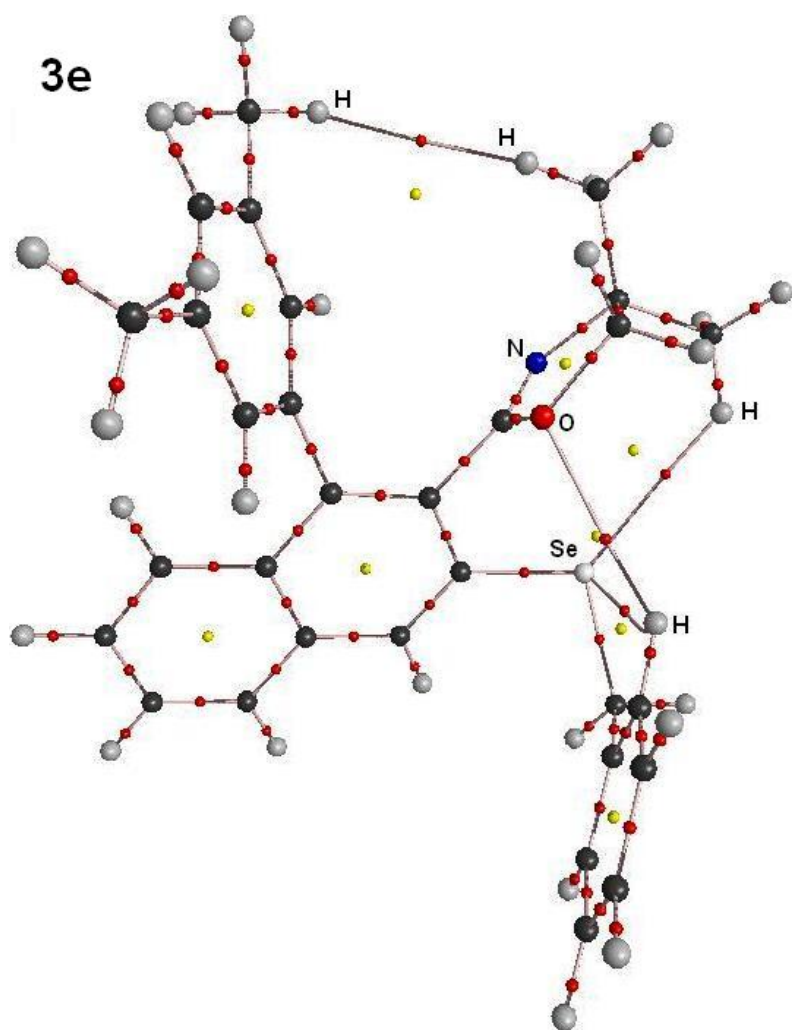

Supplement: c2ra20591b.pdf [file c2ra20591b.pdf]
